# Supplementary material for: Heterotrophic Bacterioplankton Growth and Physiological Properties in Red Sea Tropical Shallow Ecosystems With Different Dissolved Organic Matter Sources
Source: PubMed Central journal article supplement (PMC8762102; doi:10.3389/fmicb.2021.784325), 2022-01-03
Supplement: Data_Sheet_1.pdf [file Data_Sheet_1.pdf]

# **Heterotrophic bacterioplankton growth and physiological properties in Red Sea tropical shallow ecosystems with different DOM sources**

Luis Silva<sup>1\*</sup>, Maria Ll. Calleja<sup>1,2</sup>, Tamara Huete-Stauffer<sup>1</sup>, Snjezana Ivetic<sup>1</sup>, Mohd I. Ansari<sup>1,3</sup>, Miguel Viegas<sup>1</sup>, Xosé Anxelu G. Morán<sup>1,4\*</sup>

<sup>1</sup> Division of Biological and Environmental Sciences and Engineering, Red Sea Research Center, King Abdullah University of Science and Technology, Thuwal, Saudi Arabia

<sup>2</sup> Department of Climate Geochemistry, Max Planck Institute for Chemistry (MPIC), Mainz, Germany;

<sup>3</sup> Department of Biosciences, Integral University, Lucknow, India

<sup>4</sup> Centro Oceanográfico de Gijón/Xixón (IEO, CSIC), Gijón/Xixón, Spain

**\* Correspondence:**

Luis Silva: [luis.ribeirodasilva@kaust.edu.sa](mailto:luis.ribeirodasilva@kaust.edu.sa)

Xosé Anxelu G. Morán [xelu.moran@kaust.edu.sa](mailto:xelu.moran@kaust.edu.sa), [xelu.moran@ieo.es](mailto:xelu.moran@ieo.es)

**Running title:** Tropical bacteria growth and DOM

**Supplementary Table 1.** Pearson correlation coefficients between *in situ* temperature and the four single-cell physiological groups absolute (cells mL<sup>-1</sup>) and relative (%) abundances at the onset of the experiments, carrying capacities (K, cells mL<sup>-1</sup>) and specific growth rates ( $\mu$ , d<sup>-1</sup>). \*\*, p<0.01; \*, p<0.05; ns, non-significant. HNA, high nucleic acid bacteria; LNA, low nucleic acid bacteria; *Live*, membrane-intact cells; CTC+, actively respiring cells.

| Site          | Physiological group | Absolute abundance | Relative abundance | K       | $\mu$   |
|---------------|---------------------|--------------------|--------------------|---------|---------|
| Seagrass      | HNA                 | 0.86**             | 0.94**             | 0.79    | -0.71** |
|               | LNA                 | -0.95**            | ns                 | ns      | ns      |
|               | Live                | 0.84**             | -0.90**            | 0.90**  | -0.59*  |
|               | CTC+                | 0.92**             | 0.71*              | 0.88**  | -0.92*  |
| Mangrove      | HNA                 | 0.69*              | 0.91**             |         | ns      |
|               | LNA                 | -0.87**            | ns                 | -0.76** | ns      |
|               | Live                | ns                 | ns                 | 0.78**  | 0.68*   |
|               | CTC+                | 0.95**             | 0.87**             | 0.91**  | ns      |
| Phytoplankton | HNA                 | 0.69*              | 0.83**             | 0.68*   | ns      |
|               | LNA                 | -0.83**            | ns                 | -0.61*  | 0.67*   |
|               | Live                | ns                 | ns                 | 0.64*   | 0.69*   |
|               | CTC+                | 0.97**             | 0.95**             | 0.8**   | -0.93** |

**Supplementary Table 2.** Mean ( $\pm$  SE) carrying capacities ( $\times 10^5$  cells ml<sup>-1</sup>) in the Filtered treatment of the four single-cell physiological groups. HNA, high nucleic acid bacteria; LNA, low nucleic acid bacteria; *Live*, membrane-intact cells; CTC+, actively respiring cells.

|           | Seagrass              |                       |                       |                    | Mangrove              |                       |                       |                    | Phytoplankton         |                       |                       |                    |
|-----------|-----------------------|-----------------------|-----------------------|--------------------|-----------------------|-----------------------|-----------------------|--------------------|-----------------------|-----------------------|-----------------------|--------------------|
|           | HNA                   | LNA                   | <i>Live</i>           | CTC+               | HNA                   | LNA                   | <i>Live</i>           | CTC+               | HNA                   | LNA                   | <i>Live</i>           | CTC+               |
| February  | 4.85<br>$\pm$<br>0.11 | 4.37<br>$\pm$<br>0.05 | 4.50<br>$\pm$<br>0.32 | n.d.               | 6.55<br>$\pm$<br>0.47 | 2.34<br>$\pm$<br>0.21 | 4.83<br>$\pm$<br>0.22 | n.d.               | 3.60<br>$\pm$<br>0.13 | 2.92<br>$\pm$<br>0.17 | 2.45<br>$\pm$<br>0.22 | n.d.               |
| June      | 5.34<br>$\pm$<br>0.24 | 1.57<br>$\pm$<br>0.10 | 5.43<br>$\pm$<br>0.18 | 1.32 $\pm$<br>0.01 | 7.14<br>$\pm$<br>0.32 | 1.48<br>$\pm$<br>0.05 | 7.43<br>$\pm$<br>0.03 | 1.23 $\pm$<br>0.03 | 6.92<br>$\pm$<br>0.26 | 2.59<br>$\pm$<br>0.03 | 8.86<br>$\pm$<br>0.17 | 0.91 $\pm$<br>0.04 |
| September | 8.04<br>$\pm$<br>0.20 | 2.74<br>$\pm$<br>0.39 | 6.93<br>$\pm$<br>0.20 | 1.93 $\pm$<br>0.33 | 8.24<br>$\pm$<br>0.26 | 1.44<br>$\pm$<br>0.03 | 6.90<br>$\pm$<br>0.21 | 1.28 $\pm$<br>0.02 | 7.30<br>$\pm$<br>0.19 | 1.20<br>$\pm$<br>0.04 | 5.35<br>$\pm$<br>0.15 | 1.25 $\pm$<br>0.21 |
| December  | 0.74<br>$\pm$<br>0.12 | 2.86<br>$\pm$<br>0.27 | 5.02<br>$\pm$<br>0.08 | 0.69 $\pm$<br>0.06 | 4.02<br>$\pm$<br>0.34 | 2.67<br>$\pm$<br>0.14 | 6.76<br>$\pm$<br>0.22 | 0.80 $\pm$<br>0.02 | 2.18<br>$\pm$<br>0.03 | 1.05<br>$\pm$<br>0.09 | 4.85<br>$\pm$<br>0.56 | 0.67 $\pm$<br>0.02 |

**Supplementary Figure 1.** Seasonal distribution of mean ( $\pm$  SE) values of the specific growth rates (i.e., Filtered treatment) of HNA (A), LNA (B), *Live* (C) and CTC+ cells (D) at the three sites. Note that CTC+ cells specific growth rates in September could not be calculated because no growth was observed. Smooth fitting joins complete site points for clarity. Color coding: blue, Phytoplankton; orange, Mangrove; green, Seagrass.

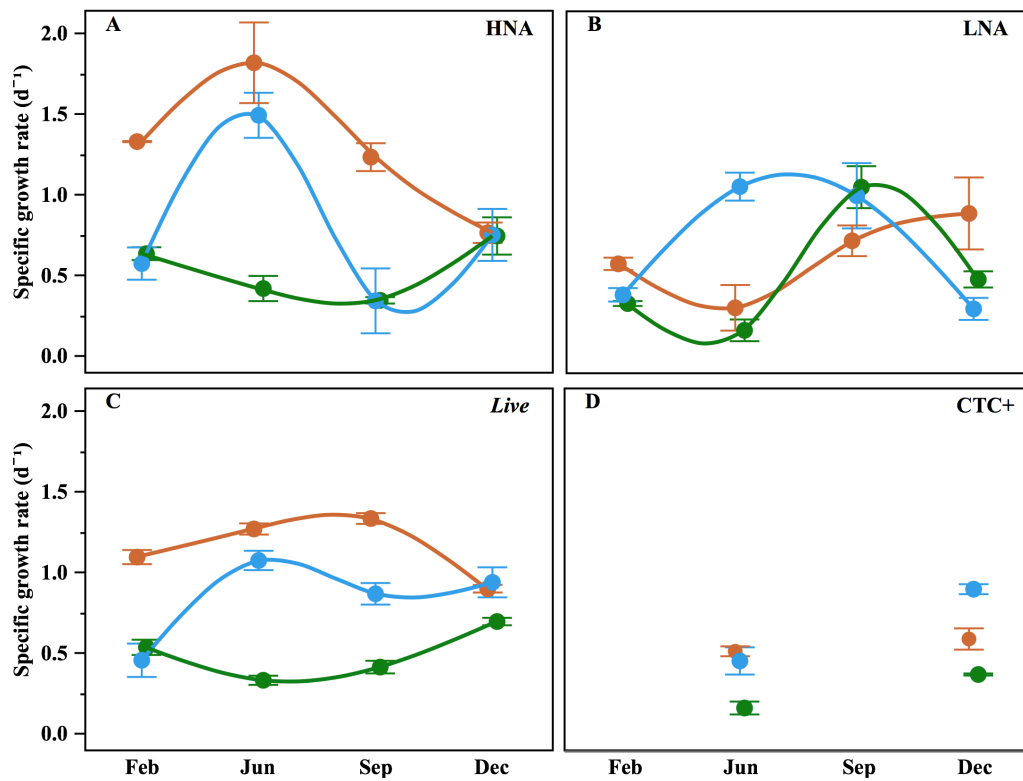

**Supplementary Figure 2.** Temporal changes in DOC concentration in the Filtered treatment incubations of samples from each month and site. Color coding: blue, Phytoplankton; orange, Mangrove; green, Seagrass.

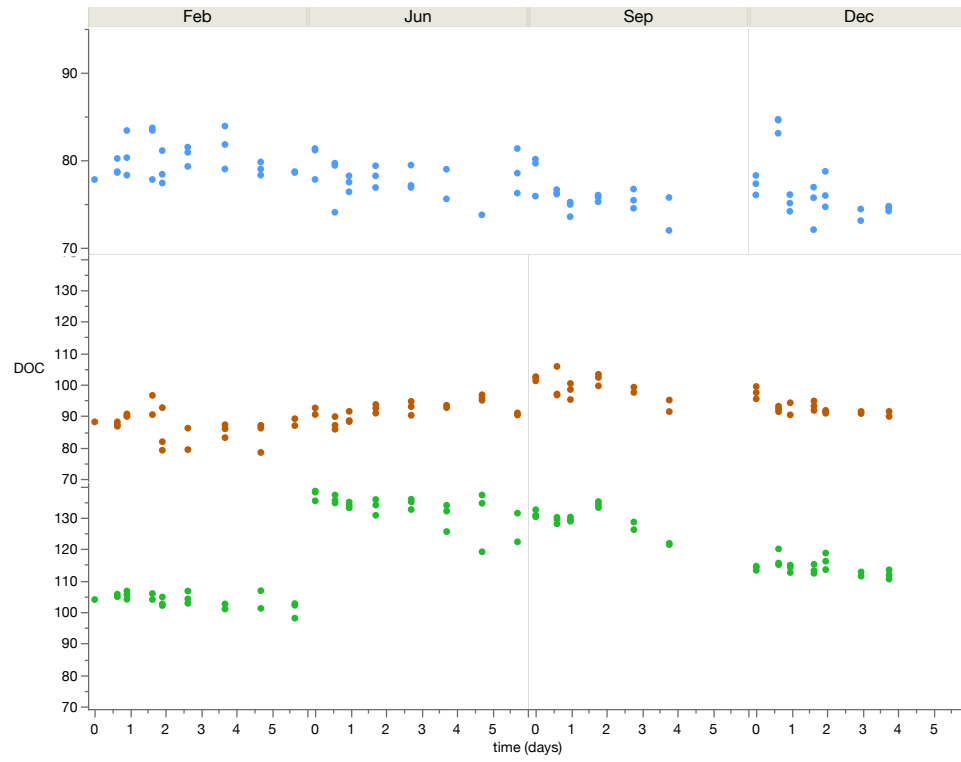

**Supplementary Figure 3.** Temporal changes in fluorescence (relative units) of the humic-like fluorescent DOM components C1 and C2 (A) and the protein-like fluorescent DOM components C3 and C4 (B) in the Filtered treatment incubations of samples from each month and site. Color coding: blue, Phytoplankton; orange, Mangrove; green, Seagrass.

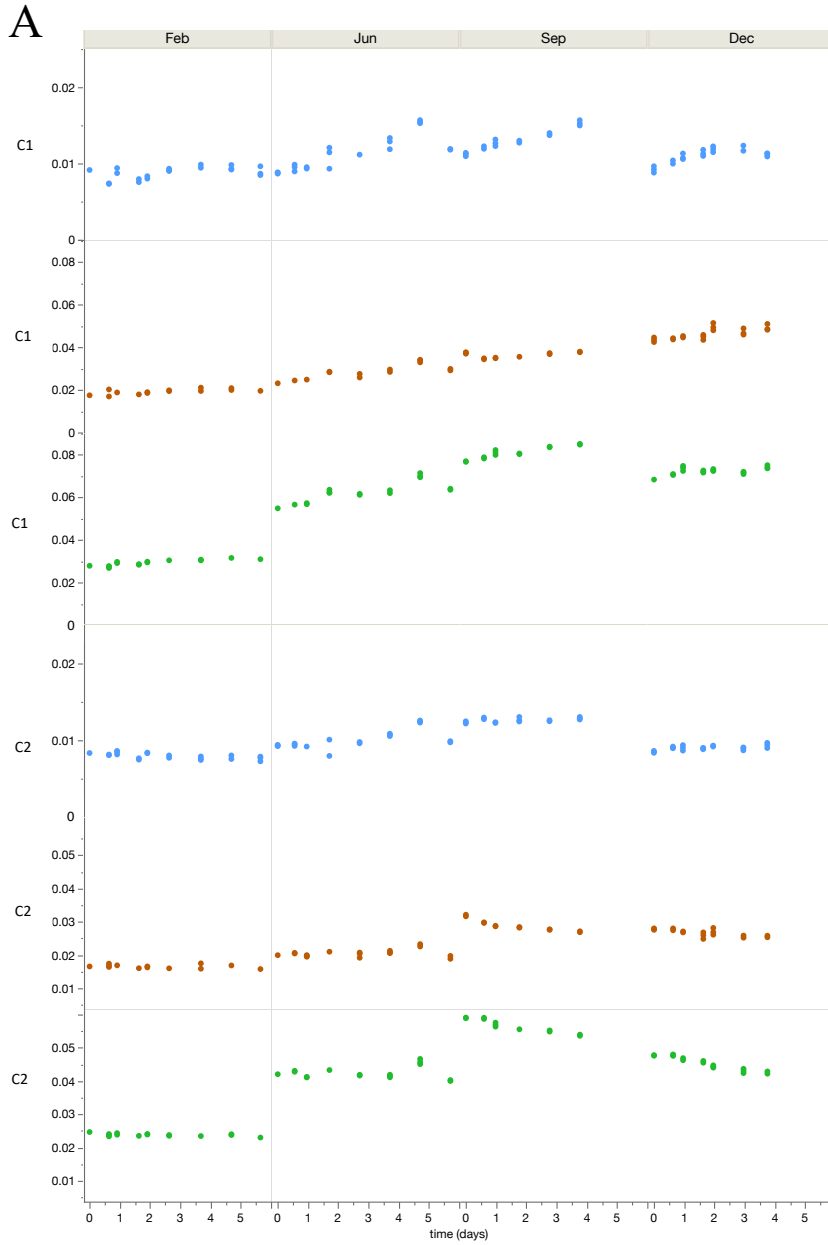

Supplementary Figure 3 (continued)

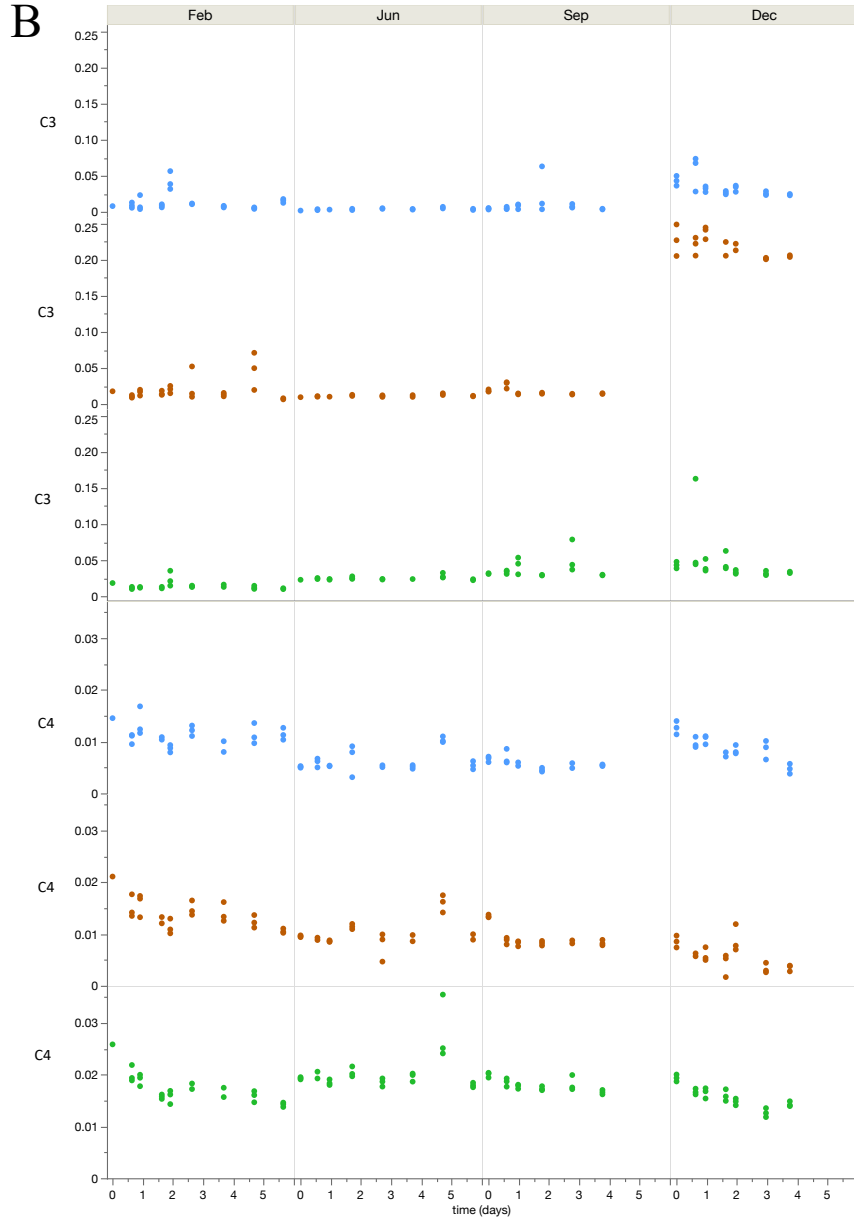

**Supplementary Figure 4.** Seasonal distribution of mean ( $\pm$  SE) production (i.e., values $>0$ ) and consumption (i.e., values $<0$ ) rates of the fluorescent DOM components C1, C2, C3 and C4 (R.U. d<sup>-1</sup>, **A**) and the inorganic nutrients nitrate, nitrite and phosphate ( $\mu\text{mol L}^{-1} \text{d}^{-1}$ , **B**) in the Filtered treatment incubations of the three sites. No phosphate dynamics were available in February. See the text for details.

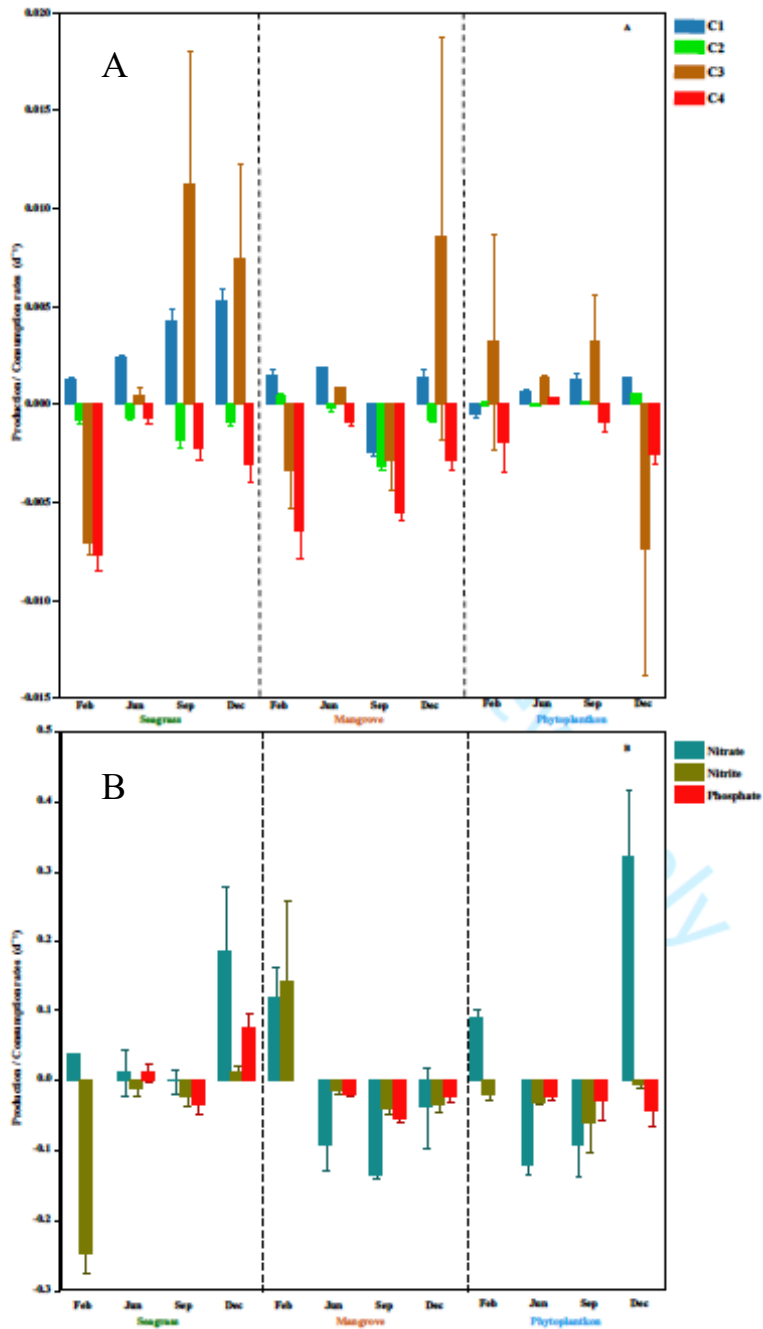



**Supplementary Figure 5.** Contribution of the different orders to total Alphaproteobacteria at the time of sample collection at the three sites (S, Seagrass; M, Mangrove; P, Phytoplankton) for each month (bar chart) and averaged for each system for the most relevant orders (table).

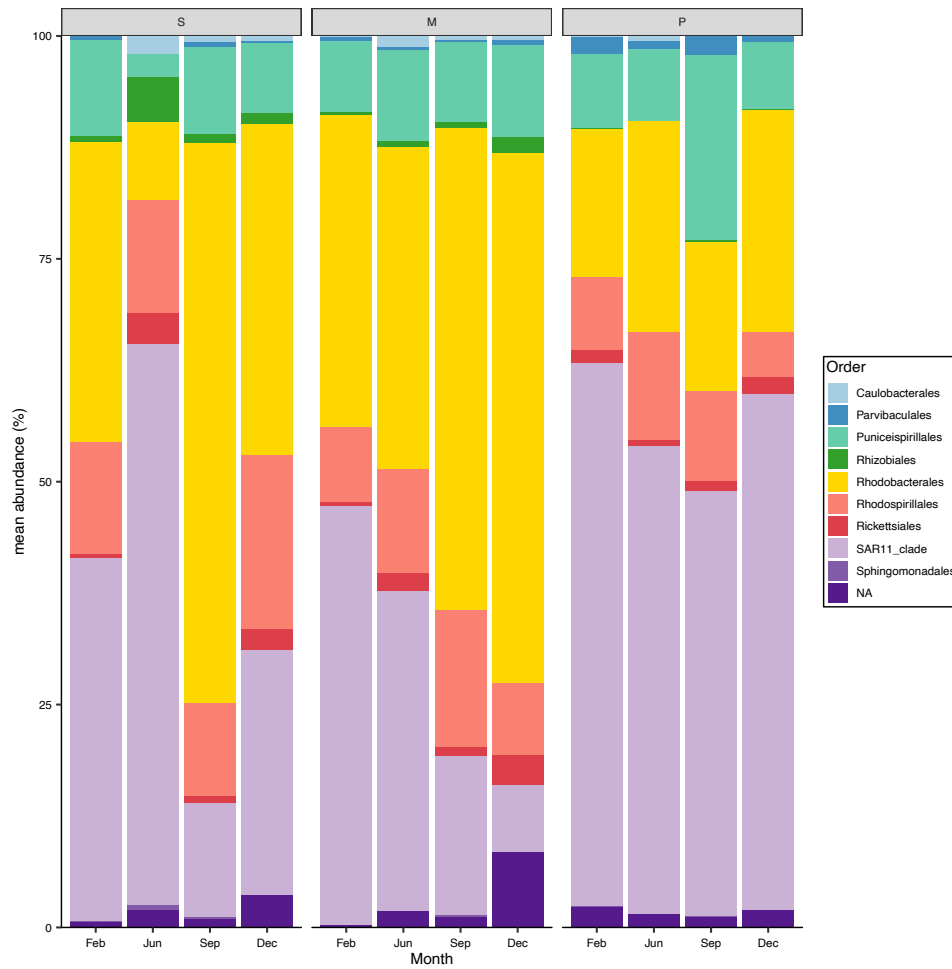

| Alphaproteobacteria Order (%) | <b>S</b> | <b>M</b> | <b>P</b> |
|-------------------------------|----------|----------|----------|
| SAR11 clade                   | 35 ± 10  | 27 ± 9   | 55 ± 3   |
| Puniceispirillales            | 8 ± 2    | 9 ± 1    | 11 ± 3   |
| Rhodospirillales              | 14 ± 2   | 11 ± 2   | 9 ± 1    |
| Rhodobacteralles              | 35 ± 11  | 46 ± 6   | 20 ± 2   |

| Month     | Station       | Temp | Tot abu t0 | LNA abu t0 | HNA abu t0 | %HNA | Live abu t0 | %Live | CTC+ abu t0 | %CTC+ | µ Comm | µ Filt | µ LNA | µ HNA | µ Live | µ CTC+ | K Comm   | K Filt   | K F/C | KLNA     | K HNA    |
|-----------|---------------|------|------------|------------|------------|------|-------------|-------|-------------|-------|--------|--------|-------|-------|--------|--------|----------|----------|-------|----------|----------|
| February  | Phytoplankton | 25.1 | 4.33E+05   | 2.05E+05   | 2.28E+05   | 47.3 | 2.00E+05    | 94.7  |             |       | 0.13   | 0.50   | 0.29  | 0.72  | 0.64   |        | 4.98E+05 | 6.31E+05 | 1.30  | 2.58E+05 | 3.73E+05 |
| February  | Phytoplankton | 25.1 | 4.33E+05   | 2.05E+05   | 2.28E+05   | 47.3 | 2.00E+05    | 94.7  |             |       | 0.17   | 0.39   | 0.40  | 0.38  | 0.44   |        | 5.09E+05 | 6.49E+05 | 1.30  | 3.15E+05 | 3.34E+05 |
| February  | Phytoplankton | 25.1 | 4.33E+05   | 2.05E+05   | 2.28E+05   | 47.3 | 2.00E+05    | 94.7  |             |       | 0.10   | 0.51   | 0.43  | 0.61  | 0.28   |        | 4.94E+05 | 6.76E+05 | 1.30  | 3.02E+05 | 3.74E+05 |
| February  | Mangrove      | 22.4 | 4.92E+05   | 2.92E+05   | 2.00E+05   | 59.3 | 2.78E+05    | 96.7  |             |       | 0.23   | 1.05   | 0.61  | 1.32  | 1.15   |        | 6.62E+05 | 9.82E+05 | 1.31  | 2.71E+05 | 7.10E+05 |
| February  | Mangrove      | 22.4 | 4.92E+05   | 2.92E+05   | 2.00E+05   | 59.3 | 2.78E+05    | 96.7  |             |       | 0.38   | 1.02   | 0.49  | 1.33  | 1.01   |        | 6.51E+05 | 7.62E+05 | 1.31  | 2.00E+05 | 5.62E+05 |
| February  | Mangrove      | 22.4 | 4.92E+05   | 2.92E+05   | 2.00E+05   | 59.3 | 2.78E+05    | 96.7  |             |       | 0.06   | 1.04   | 0.60  | 1.33  | 1.12   |        | 7.21E+05 | 9.23E+05 | 1.31  | 2.32E+05 | 6.91E+05 |
| February  | Seagrass      | 22.4 | 7.54E+05   | 3.85E+05   | 3.69E+05   | 51.1 | 4.28E+05    | 97.9  |             |       |        | 0.49   | 0.31  | 0.67  | 0.48   |        | 7.54E+05 |          | 1.23  |          |          |
| February  | Seagrass      | 22.4 | 7.54E+05   | 3.85E+05   | 3.69E+05   | 51.1 | 4.28E+05    | 97.9  |             |       |        | 0.42   | 0.30  | 0.55  | 0.49   |        | 7.54E+05 | 9.40E+05 | 1.23  | 4.43E+05 | 4.98E+05 |
| February  | Seagrass      | 22.4 | 7.54E+05   | 3.85E+05   | 3.69E+05   | 51.1 | 4.28E+05    | 97.9  |             |       |        | 0.51   | 0.35  | 0.67  | 0.63   |        | 7.54E+05 | 9.07E+05 | 1.23  | 4.32E+05 | 4.75E+05 |
| June      | Phytoplankton | 29.8 | 4.13E+05   | 2.69E+05   | 1.44E+05   | 65.1 | 4.77E+05    | 94.1  | 3.92E+04    | 9.5   | 0.36   | 1.24   | 0.95  | 1.36  | 0.96   | 0.36   | 6.29E+05 | 1.00E+06 | 1.64  | 2.61E+05 | 7.41E+05 |
| June      | Phytoplankton | 29.8 | 4.34E+05   | 3.27E+05   | 1.07E+05   | 75.3 | 3.92E+05    | 92.9  | 4.20E+04    | 9.7   | 0.47   | 1.23   | 0.97  | 1.34  | 1.08   | 0.36   | 5.49E+05 | 9.08E+05 | 1.64  | 2.53E+05 | 6.56E+05 |
| June      | Phytoplankton | 29.8 | 4.04E+05   | 2.40E+05   | 1.64E+05   | 59.4 | 3.96E+05    | 93.3  | 4.34E+04    | 10.7  | 0.32   | 1.59   | 1.22  | 1.77  | 1.17   | 0.62   | 5.67E+05 | 9.42E+05 | 1.64  | 2.64E+05 | 6.78E+05 |
| June      | Mangrove      | 30.0 | 5.68E+05   | 4.51E+05   | 1.17E+05   | 79.4 | 4.64E+05    | 88.6  | 9.87E+04    | 17.4  | 0.39   | 1.41   | 0.53  | 1.69  | 1.34   | 0.46   | 7.46E+05 | 9.37E+05 | 1.08  | 1.58E+05 | 7.79E+05 |
| June      | Mangrove      | 30.0 | 6.06E+05   | 4.85E+05   | 1.21E+05   | 80.0 | 4.94E+05    | 86.4  | 9.86E+04    | 16.3  | 0.66   | 1.82   | 0.31  | 2.30  | 1.23   | 0.49   | 8.42E+05 | 8.27E+05 | 1.08  | 1.48E+05 | 6.79E+05 |
| June      | Mangrove      | 30.0 | 7.01E+05   | 5.59E+05   | 1.42E+05   | 79.7 | 4.75E+05    | 86.1  | 9.85E+04    | 14.1  | 0.28   | 1.09   | 0.04  | 1.46  | 1.23   | 0.57   | 8.05E+05 | 8.24E+05 | 1.08  | 1.39E+05 | 6.85E+05 |
| June      | Seagrass      | 29.4 | 7.10E+05   | 5.63E+05   | 1.47E+05   | 79.3 | 5.14E+05    | 93.5  | 1.14E+05    | 16.1  | 0.08   | 0.27   | 0.05  | 0.34  | 0.37   | 0.10   | 6.66E+05 | 6.63E+05 | 0.95  | 1.48E+05 | 5.15E+05 |
| June      | Seagrass      | 29.4 | 7.04E+05   | 5.47E+05   | 1.57E+05   | 77.7 | 5.12E+05    | 91.7  | 1.48E+05    | 21.0  | 0.06   | 0.50   | 0.28  | 0.57  | 0.27   | 0.12   | 7.61E+05 | 7.58E+05 | 0.95  | 1.77E+05 | 5.81E+05 |
| June      | Seagrass      | 29.4 | 7.05E+05   | 5.46E+05   | 1.59E+05   | 77.4 | 5.11E+05    | 92.0  | 1.57E+05    | 22.3  | 0.04   | 0.28   | 0.13  | 0.33  | 0.33   | 0.23   | 7.62E+05 | 6.51E+05 | 0.95  | 1.46E+05 | 5.05E+05 |
| September | Phytoplankton | 31.7 | 4.58E+05   | 3.69E+05   | 8.91E+04   | 80.6 | 3.21E+05    | 93.5  | 1.47E+05    | 32.1  | 0.42   | 0.83   | 1.39  | 0.74  | 0.98   |        | 1.02E+06 | 8.26E+05 | 0.97  | 1.12E+05 | 7.14E+05 |
| September | Phytoplankton | 31.7 | 4.63E+05   | 3.77E+05   | 8.57E+04   | 81.5 | 2.66E+05    | 90.7  | 1.27E+05    | 27.4  | 0.32   | 0.25   | 0.73  | 0.13  | 0.86   |        | 8.22E+05 | 8.92E+05 | 0.97  | 1.25E+05 | 7.67E+05 |
| September | Phytoplankton | 31.7 | 4.70E+05   | 3.73E+05   | 9.70E+04   | 79.4 | 2.71E+05    | 89.4  | 1.15E+05    | 24.5  | 0.17   | 0.31   | 0.85  | 0.14  | 0.75   |        | 7.82E+05 | 8.31E+05 | 0.97  | 1.22E+05 | 7.09E+05 |
| September | Mangrove      | 33.3 | 4.25E+05   | 3.43E+05   | 8.19E+04   | 80.7 | 3.66E+05    | 94.1  | 1.25E+05    | 29.4  | 0.56   | 1.30   | 0.90  | 1.38  | 1.33   |        | 7.44E+05 | 1.02E+06 | 1.31  | 1.49E+05 | 8.72E+05 |
| September | Mangrove      | 33.3 | 6.70E+05   | 5.34E+05   | 1.36E+05   | 79.7 | 3.99E+05    | 90.9  | 1.63E+05    | 24.3  | 0.07   | 1.12   | 0.60  | 1.23  | 1.27   |        | 8.02E+05 | 9.60E+05 | 1.31  | 1.42E+05 | 8.18E+05 |
| September | Mangrove      | 33.3 | 5.90E+05   | 4.75E+05   | 1.15E+05   | 80.5 | 3.94E+05    | 91.5  | 1.57E+05    | 26.6  | 0.26   | 0.99   | 0.63  | 1.08  | 1.39   |        | 6.68E+05 | 9.21E+05 | 1.31  | 1.40E+05 | 7.81E+05 |
| September | Seagrass      | 32.7 | 7.61E+05   | 6.24E+05   | 1.37E+05   | 82.0 | 5.08E+05    | 88.5  | 1.91E+05    | 25.1  | 0.27   | 0.55   | 1.28  | 0.36  | 0.47   |        | 8.94E+05 | 1.09E+06 | 1.19  | 3.08E+05 | 7.85E+05 |
| September | Seagrass      | 32.7 | 8.82E+05   | 7.41E+05   | 1.41E+05   | 84.0 | 5.38E+05    | 87.7  | 1.78E+05    | 20.2  |        | 0.50   | 1.02  | 0.36  | 0.34   |        | 8.67E+05 | 1.16E+06 | 1.19  | 3.17E+05 | 8.43E+05 |
| September | Seagrass      | 32.7 | 6.75E+05   | 5.59E+05   | 1.16E+05   | 82.8 | 4.95E+05    | 88.5  | 2.09E+05    | 31.0  | 0.59   | 0.40   | 0.83  | 0.30  | 0.41   |        | 9.62E+05 | 9.81E+05 | 1.19  | 1.96E+05 | 7.85E+05 |
| December  | Phytoplankton | 28.6 | 2.27E+05   | 1.13E+05   | 1.14E+05   | 49.8 | 1.98E+05    | 83.8  | 1.23E+04    | 5.4   | 0.12   | 0.61   | 0.36  | 0.85  | 1.12   | 0.83   | 2.73E+05 | 3.10E+05 | 1.05  | 1.05E+05 | 2.05E+05 |
| December  | Phytoplankton | 28.6 | 2.44E+05   | 1.14E+05   | 1.30E+05   | 46.7 | 1.90E+05    | 85.2  | 1.68E+04    | 6.9   | 0.04   | 0.64   | 0.35  | 0.96  | 0.89   | 0.92   | 3.38E+05 | 4.01E+05 | 1.05  | 1.21E+05 | 2.80E+05 |
| December  | Phytoplankton | 28.6 | 2.11E+05   | 9.84E+04   | 1.13E+05   | 46.5 | 1.85E+05    | 83.3  | 1.59E+04    | 7.5   | 0.30   | 0.30   | 0.15  | 0.43  | 0.80   | 0.92   | 3.15E+05 | 2.58E+05 | 1.05  | 8.93E+04 | 1.68E+05 |
| December  | Mangrove      | 26.4 | 5.09E+05   | 3.11E+05   | 1.98E+05   | 61.1 | 3.73E+05    | 94.1  | 6.08E+04    | 11.9  | 0.01   | 1.03   | 1.29  | 0.87  | 0.90   | 0.53   | 5.41E+05 | 7.63E+05 | 1.11  | 2.94E+05 | 4.68E+05 |
| December  | Mangrove      | 26.4 | 4.77E+05   | 3.08E+05   | 1.69E+05   | 64.6 | 3.84E+05    | 92.7  | 6.73E+04    | 14.1  | 0.56   | 0.79   | 0.83  | 0.76  | 0.85   | 0.50   | 5.79E+05 | 6.33E+05 | 1.11  | 2.58E+05 | 3.75E+05 |
| December  | Mangrove      | 26.4 | 4.28E+05   | 2.69E+05   | 1.59E+05   | 62.9 | 4.31E+05    | 92.2  | 6.91E+04    | 16.1  | 0.94   | 0.60   | 0.52  | 0.65  | 0.93   | 0.71   | 6.15E+05 | 6.10E+05 | 1.11  | 2.48E+05 | 3.62E+05 |
| December  | Seagrass      | 25.5 | 6.04E+05   | 3.29E+05   | 2.75E+05   | 54.5 | 4.54E+05    | 91.7  | 1.20E+05    | 19.9  | 1.24   | 0.66   | 0.43  | 0.93  | 0.68   | 0.37   | 8.24E+05 | 5.46E+05 | 0.86  | 2.59E+05 | 2.87E+05 |
| December  | Seagrass      | 25.5 | 6.33E+05   | 3.29E+05   | 3.04E+05   | 52.0 | 4.64E+05    | 93.9  | 8.35E+04    | 13.2  | 0.07   | 0.47   | 0.41  | 0.53  | 0.73   |        | 6.44E+05 | 6.00E+05 | 0.86  | 2.57E+05 | 3.43E+05 |
| December  | Seagrass      | 25.5 | 5.11E+05   | 2.63E+05   | 2.48E+05   | 51.5 | 4.08E+05    | 92.8  | 8.82E+04    | 17.3  | 1.24   | 0.64   | 0.57  | 0.76  | 0.65   | 0.36   | 6.98E+05 | 7.57E+05 | 0.86  | 3.41E+05 | 4.17E+05 |

| <i>K Live</i> | <i>K CTC+</i> | DOC   | DON  | C:N  | pChl <i>a</i> | nChl <i>a</i> | mChl <i>a</i> | Chl <i>a</i> | BGE  | NO <sub>2</sub> <sup>-</sup> | NO <sub>3</sub> <sup>-</sup> | PO <sub>4</sub> <sup>-3</sup> | NO <sub>2</sub> <sup>-</sup> c.r. | NO <sub>3</sub> <sup>-</sup> c.r. | PO <sub>4</sub> <sup>-3</sup> c.r. | DON c.r | C1    | C2    | C3    | C4    | FDOM  | %protein | C1 c.r. | C2 c.r. | C3 c.r. | C4 c.r. |
|---------------|---------------|-------|------|------|---------------|---------------|---------------|--------------|------|------------------------------|------------------------------|-------------------------------|-----------------------------------|-----------------------------------|------------------------------------|---------|-------|-------|-------|-------|-------|----------|---------|---------|---------|---------|
| 2.81E+05      |               | 77.8  | 3.4  | 22.9 | 0.11          | 0.02          | 0.01          | 0.14         |      | 0.05                         | 0.32                         |                               | -0.013                            | 0.094                             |                                    | -0.118  | 0.007 | 0.007 | 0.008 | 0.015 | 0.037 | 62.0     | -0.001  | 0.000   | -0.004  | -0.004  |
| 2.49E+05      |               | 77.8  | 3.4  | 22.9 | 0.11          | 0.02          | 0.01          | 0.14         |      | 0.05                         | 0.32                         |                               | -0.032                            | 0.107                             |                                    | 1.243   | 0.007 | 0.007 | 0.008 | 0.015 | 0.037 | 62.0     | 0.000   | 0.000   | 0.000   | -0.003  |
| 2.05E+05      |               | 77.8  | 3.4  | 22.9 | 0.11          | 0.02          | 0.01          | 0.14         |      | 0.05                         | 0.32                         |                               | -0.015                            | 0.070                             |                                    | 0.911   | 0.007 | 0.007 | 0.008 | 0.015 | 0.037 | 62.0     | -0.001  | 0.000   | 0.014   | 0.001   |
| 5.15E+05      |               | 88.2  | 3.8  | 23.2 | 0.18          | 0.14          | 0.01          | 0.33         | 15.2 | 0.04                         | 0.29                         |                               | 0.030                             | 0.120                             |                                    | 1.135   | 0.017 | 0.017 | 0.018 | 0.021 | 0.073 | 53.5     | 0.001   | 0.000   | -0.003  | -0.006  |
| 4.41E+05      |               | 88.2  | 3.8  | 23.2 | 0.18          | 0.14          | 0.01          | 0.33         |      | 0.04                         | 0.29                         |                               | 0.376                             | 0.193                             |                                    | 1.489   | 0.017 | 0.017 | 0.018 | 0.021 | 0.073 | 53.5     | 0.002   | 0.001   | 0.000   | -0.004  |
| 4.92E+05      |               | 88.2  | 3.8  | 23.2 | 0.18          | 0.14          | 0.01          | 0.33         | 20.7 | 0.04                         | 0.29                         |                               | 0.015                             | 0.044                             |                                    | 1.855   | 0.017 | 0.017 | 0.018 | 0.021 | 0.073 | 53.5     | 0.001   | 0.000   | -0.007  | -0.009  |
| 4.23E+05      |               | 104.0 | 6.5  | 16.0 | 0.06          | 0.16          | 0.04          | 0.26         |      | 0.29                         | 0.12                         |                               | -0.216                            | 0.037                             |                                    | -0.827  | 0.028 | 0.025 | 0.019 | 0.026 | 0.097 | 45.9     | 0.002   | 0.000   | -0.008  | -0.009  |
| 4.13E+05      |               | 104.0 | 6.5  | 16.0 | 0.06          | 0.16          | 0.04          | 0.26         |      | 0.29                         | 0.12                         |                               | -0.301                            | 0.031                             |                                    | -0.682  | 0.028 | 0.025 | 0.019 | 0.026 | 0.097 | 45.9     | 0.001   | -0.001  | -0.007  | -0.006  |
| 5.14E+05      |               | 104.0 | 6.5  | 16.0 | 0.06          | 0.16          | 0.04          | 0.26         |      | 0.29                         | 0.12                         |                               | -0.231                            | 0.039                             |                                    | -1.348  | 0.028 | 0.025 | 0.019 | 0.026 | 0.097 | 45.9     | 0.001   | -0.001  | -0.006  | -0.008  |
| 9.18E+05      | 9.86E+04      | 77.8  | 5.59 | 13.9 | 0.08          | 0.02          | 0.04          | 0.14         | 4.2  | 0.03                         | 0.23                         | 0.018                         | -0.037                            | -0.123                            | -0.032                             | -0.955  | 0.007 | 0.008 | 0.003 | 0.005 | 0.023 | 35.9     | 0.001   | 0.000   | 0.001   | 0.000   |
| 8.79E+05      | 8.73E+04      | 81.2  | 5.03 | 16.1 | 0.08          | 0.02          | 0.04          | 0.14         | 9.1  | 0.02                         | 0.13                         | 0.018                         | -0.027                            | -0.141                            | -0.017                             | 0.022   | 0.007 | 0.007 | 0.002 | 0.005 | 0.022 | 32.9     | 0.000   | 0.000   | 0.001   | 0.000   |
| 8.61E+05      | 8.77E+04      | 81.3  | 6.75 | 12.1 | 0.08          | 0.02          | 0.04          | 0.14         | 11.4 | 0.03                         | 0.18                         | 0.018                         | -0.032                            | -0.100                            | -0.021                             | -1.904  | 0.007 | 0.007 | 0.002 | 0.005 | 0.022 | 34.5     | 0.001   | 0.000   | 0.001   | 0.000   |
| 7.38E+05      | 1.27E+05      | 92.6  | 5.54 | 16.7 | 0.04          | 0.09          | 0.39          | 0.53         | 8.9  | 0.03                         | 0.25                         | 0.016                         | -0.009                            | -0.135                            | -0.015                             | -0.141  | 0.023 | 0.020 | 0.010 | 0.009 | 0.062 | 30.8     | 0.002   | 0.000   | 0.001   | -0.001  |
| 7.44E+05      | 1.18E+05      | 90.5  | 5.99 | 15.1 | 0.04          | 0.09          | 0.39          | 0.53         | 9.4  | 0.04                         | 0.17                         | 0.020                         | -0.021                            | -0.024                            | -0.019                             | 0.025   | 0.023 | 0.020 | 0.010 | 0.010 | 0.063 | 31.7     | 0.002   | 0.000   | 0.001   | -0.001  |
| 7.47E+05      | 1.22E+05      | 92.8  | 5.55 | 16.7 | 0.04          | 0.09          | 0.39          | 0.53         | 2.5  | 0.04                         | 0.21                         | 0.018                         | -0.011                            | -0.122                            | -0.022                             | 0.403   | 0.023 | 0.020 | 0.010 | 0.010 | 0.063 | 31.3     | 0.002   | 0.000   | 0.001   | -0.001  |
| 5.77E+05      | 1.32E+05      | 138.1 | 7.06 | 19.6 | 0.05          | 0.13          | 1.18          | 1.35         | 1.8  | 0.02                         | 0.03                         | 0.006                         | -0.010                            | 0.074                             | -0.001                             | 0.239   | 0.055 | 0.042 | 0.024 | 0.020 | 0.140 | 30.8     | 0.002   | -0.001  | 0.000   | 0.000   |
| 5.16E+05      | 1.33E+05      | 135.3 | 7.75 | 17.5 | 0.05          | 0.13          | 1.18          | 1.35         | 5.1  | 0.01                         | 0.01                         |                               | 0.001                             | 0.001                             | 0.038                              | -1.356  | 0.055 | 0.042 | 0.023 | 0.019 | 0.139 | 30.3     | 0.003   | -0.001  | 0.001   | -0.001  |
| 5.37E+05      | 1.29E+05      | 138.4 | 7    | 19.8 | 0.05          | 0.13          | 1.18          | 1.35         | 2.7  | 0.04                         | 0.05                         | 0.014                         | -0.027                            | -0.039                            | -0.004                             | 0.050   | 0.055 | 0.042 | 0.023 | 0.019 | 0.140 | 30.6     | 0.002   | -0.001  | 0.000   | -0.001  |
| 5.32E+05      | 8.33E+04      | 75.9  | 5.37 | 14.1 | 0.04          | 0.02          | 0.02          | 0.08         | 6.6  | 0.02                         | 0.07                         | 0.007                         | -0.015                            | -0.012                            | 0.030                              |         | 0.009 | 0.010 | 0.006 | 0.007 | 0.031 | 40.8     | 0.002   | 0.000   | -0.002  | -0.001  |
| 5.61E+05      | 1.38E+05      | 79.7  | 4.72 | 16.9 | 0.04          | 0.02          | 0.02          | 0.08         | 1.9  | 0.03                         | 0.13                         | 0.069                         | -0.027                            | -0.102                            | -0.051                             | 0.112   | 0.009 | 0.010 | 0.005 | 0.006 | 0.030 | 36.2     | 0.001   | 0.000   | 0.005   | 0.000   |
| 5.11E+05      | 1.53E+05      | 80.1  | 4.3  | 18.6 | 0.04          | 0.02          | 0.02          | 0.08         | 1.3  | 0.14                         | 0.21                         | 0.074                         | -0.141                            | -0.165                            | -0.064                             | 0.084   | 0.009 | 0.010 | 0.004 | 0.007 | 0.029 | 35.7     | 0.001   | 0.000   | 0.007   | -0.002  |
| 7.02E+05      | 1.26E+05      | 101.2 | 6.4  | 15.8 | 0.12          | 0.15          | 0.14          | 0.41         |      | 0.08                         | 0.85                         | 0.040                         | -0.036                            | -0.143                            | -0.064                             | -0.778  | 0.037 | 0.032 | 0.018 | 0.013 | 0.101 | 31.3     | -0.002  | -0.003  | -0.003  | -0.005  |
| 7.18E+05      | 1.31E+05      | 102.5 | 6.2  | 16.5 | 0.12          | 0.15          | 0.14          | 0.41         | 4.7  | 0.07                         | 0.84                         | 0.034                         | -0.031                            | -0.135                            | -0.048                             | -0.145  | 0.038 | 0.032 | 0.021 | 0.014 | 0.104 | 33.0     | -0.003  | -0.003  | -0.006  | -0.005  |
| 6.50E+05      | 1.25E+05      | 102.3 | 6.36 | 16.1 | 0.12          | 0.15          | 0.14          | 0.41         | 2.6  | 0.09                         | 0.83                         | 0.021                         | -0.054                            | -0.132                            | -0.049                             | -0.625  | 0.037 | 0.032 | 0.017 | 0.013 | 0.100 | 31.0     | -0.002  | -0.003  | 0.000   | -0.006  |
| 7.32E+05      | 1.38E+05      | 130.3 | 8.68 | 15.0 | 0.15          | 0.15          | 0.12          | 0.41         | 5.5  | 0.03                         | 0.11                         | 0.018                         | -0.007                            | -0.017                            | -0.014                             | -0.508  | 0.077 | 0.059 | 0.031 | 0.019 | 0.186 | 27.2     | 0.005   | -0.001  | 0.022   | -0.001  |
| 6.85E+05      | 1.90E+05      | 132.5 | 8.95 | 14.8 | 0.15          | 0.15          | 0.12          | 0.41         | 3.4  | 0.06                         | 0.14                         | 0.057                         | -0.045                            | -0.018                            | -0.047                             | -0.305  | 0.077 | 0.059 | 0.031 | 0.020 | 0.188 | 27.4     | 0.004   | -0.002  | 0.014   | -0.003  |
| 6.61E+05      | 2.51E+05      | 130.8 | 8.94 | 14.6 | 0.15          | 0.15          | 0.12          | 0.41         |      | 0.03                         | 0.10                         | 0.043                         | -0.020                            | 0.034                             | -0.046                             | -0.393  | 0.077 | 0.059 | 0.032 | 0.020 | 0.188 | 27.9     | 0.003   | -0.002  | -0.002  | -0.003  |
| 4.17E+05      | 6.33E+04      | 78.3  | 4.36 | 17.9 | 0.2           | 0.04          | 0.01          | 0.26         | 2.1  | 0.01                         | 0.31                         | 0.091                         | 0.001                             | 0.451                             | -0.085                             | 0.048   | 0.008 | 0.007 | 0.050 | 0.011 | 0.076 | 80.8     | 0.001   | 0.001   | -0.020  | -0.002  |
| 5.97E+05      | 6.69E+04      | 76.0  | 4.78 | 15.9 | 0.2           | 0.04          | 0.01          | 0.26         |      | 0.01                         | 0.30                         | 0.040                         | -0.013                            | 0.132                             | -0.028                             | -0.199  | 0.007 | 0.007 | 0.036 | 0.014 | 0.064 | 78.6     | 0.001   | 0.000   | 0.000   | -0.003  |
| 4.42E+05      | 7.05E+04      | 77.3  | 4.28 | 18.1 | 0.2           | 0.04          | 0.01          | 0.26         | 17.5 | 0.01                         | 0.51                         | 0.026                         | -0.005                            | 0.374                             | -0.014                             | -0.848  | 0.007 | 0.007 | 0.043 | 0.013 | 0.070 | 79.8     | 0.001   | 0.000   | -0.002  | -0.002  |
| 7.07E+05      | 8.21E+04      | 99.4  | 5.2  | 19.1 | 0.23          | 0.09          | 0.03          | 0.35         | 2.2  | 0.08                         | 1.17                         | 0.062                         | -0.053                            | -0.105                            | -0.031                             | -0.848  | 0.045 | 0.028 | 0.248 | 0.010 | 0.331 | 78.0     | 0.001   | -0.001  | -0.009  | -0.003  |
| 6.34E+05      | 7.67E+04      | 95.5  | 5.58 | 17.1 | 0.23          | 0.09          | 0.03          | 0.35         | 5.3  | 0.06                         | 0.96                         | 0.038                         | -0.025                            | 0.078                             | -0.009                             | 0.194   | 0.043 | 0.028 | 0.205 | 0.007 | 0.282 | 75.2     | 0.002   | -0.001  | 0.026   | -0.002  |
| 6.86E+05      | 8.08E+04      | 97.5  | 5.02 | 19.4 | 0.23          | 0.09          | 0.03          | 0.35         | 1.7  | 0.08                         | 1.00                         | 0.088                         | -0.026                            | -0.087                            | -0.028                             | -0.856  | 0.044 | 0.028 | 0.227 | 0.009 | 0.307 | 76.7     | 0.001   | -0.001  | 0.009   | -0.004  |
| 5.05E+05      | 5.79E+04      | 113.3 | 7.78 | 14.6 | 0.2           | 0.14          | 0.04          | 0.38         | 14.4 | 0.07                         | 0.65                         | 0.028                         | 0.011                             | 0.337                             | 0.058                              | -0.847  | 0.068 | 0.048 | 0.048 | 0.019 | 0.183 | 36.5     | 0.006   | -0.001  | 0.015   | -0.002  |
| 5.13E+05      | 7.17E+04      | 114.6 | 7    | 16.4 | 0.2           | 0.14          | 0.04          | 0.38         | 16.2 | 0.05                         | 0.57                         | 0.021                         | 0.030                             | 0.201                             | 0.052                              | 0.330   | 0.068 | 0.048 | 0.039 | 0.020 | 0.175 | 33.7     | 0.005   | -0.001  | -0.002  | -0.005  |
| 4.88E+05      | 7.71E+04      | 114.2 | 7.26 | 15.7 | 0.2           | 0.14          | 0.04          | 0.38         | 9.2  | 0.08                         | 0.71                         | 0.068                         | -0.003                            | 0.015                             | 0.116                              | -0.492  | 0.068 | 0.048 | 0.043 | 0.019 | 0.179 | 35.1     | 0.004   | -0.001  | 0.008   | -0.002  |

|                                    |                                                                        |
|------------------------------------|------------------------------------------------------------------------|
| Month                              |                                                                        |
| Station                            | (triplicates)                                                          |
| Temp                               | Temperature (°C)                                                       |
| Tot abu t0                         | Initial total abundance (cells mL <sup>-1</sup> )                      |
| LNA abu t0                         | Initial LNA abundance (cells mL <sup>-1</sup> )                        |
| HNA abu t0                         | Initial HNA abundance (cells mL <sup>-1</sup> )                        |
| %HNA                               | relative contribution of HNA cells                                     |
| <i>Live</i> abu t0                 | Initial <i>Live</i> abundance (cells mL <sup>-1</sup> )                |
| %Live                              | relative contribution of <i>Live</i> cells                             |
| CTC+ abu t0                        | Initial CTC+ abundance (cells mL <sup>-1</sup> )                       |
| %CTC+                              | relative contribution of CTC+ cells                                    |
| μ Comm                             | Specific growth rate Community treatment (d <sup>-1</sup> )            |
| μ Filt                             | Specific growth rate Filtered treatment (d <sup>-1</sup> )             |
| μ LNA                              | Specific growth rate LNA cells (d <sup>-1</sup> )                      |
| μ HNA                              | Specific growth rate HNA cells (d <sup>-1</sup> )                      |
| μ <i>Live</i>                      | Specific growth rate <i>Live</i> cells (d <sup>-1</sup> )              |
| μ CTC+                             | Specific growth rate CTC+ cells (d <sup>-1</sup> )                     |
| K Comm                             | Carrying capacity Community treatment (cells mL <sup>-1</sup> )        |
| K Filt                             | Carrying capacity Filtered treatment (cells mL <sup>-1</sup> )         |
| K F/C                              | Ratio of Community to Filtered treatment carrying capacities           |
| K LNA                              | Carrying capacity LNA (cells mL <sup>-1</sup> )                        |
| K HNA                              | Carrying capacity HNA (cells mL <sup>-1</sup> )                        |
| K <i>Live</i>                      | Carrying capacity <i>Live</i> (cells mL <sup>-1</sup> )                |
| K CTC+                             | Carrying capacity CTC+ (cells mL <sup>-1</sup> )                       |
| DOC                                | DOC concentration (μmol C L <sup>-1</sup> )                            |
| DON                                | DON concentration (μmol N L <sup>-1</sup> )                            |
| C:N                                | DOC:DON concentration ratio                                            |
| pChl <i>a</i>                      | picoplankton chlorophyll <i>a</i> concentration (μg L <sup>-1</sup> )  |
| nChl <i>a</i>                      | nanoplankton chlorophyll <i>a</i> concentration (μg L <sup>-1</sup> )  |
| mChl <i>a</i>                      | microplankton chlorophyll <i>a</i> concentration (μg L <sup>-1</sup> ) |
| Chl <i>a</i>                       | total chlorophyll <i>a</i> concentration (μg L <sup>-1</sup> )         |
| BGE                                | bacterial growth efficiency (%)                                        |
| NO <sub>2</sub> <sup>-</sup>       | nitrite concentration (μmol L <sup>-1</sup> )                          |
| NO <sub>3</sub> <sup>-</sup>       | nitrate concentration (μmol L <sup>-1</sup> )                          |
| PO <sub>4</sub> <sup>3-</sup>      | phosphate concentration (μmol L <sup>-1</sup> )                        |
| NO <sub>2</sub> <sup>-</sup> c.r.  | nitrite consumption rate (μmol L <sup>-1</sup> d <sup>-1</sup> )       |
| NO <sub>3</sub> <sup>-</sup> c.r.  | nitrate consumption rate (μmol L <sup>-1</sup> d <sup>-1</sup> )       |
| PO <sub>4</sub> <sup>3-</sup> c.r. | phosphate consumption rate (μmol L <sup>-1</sup> d <sup>-1</sup> )     |
| DON c.r.                           | DON consumption rate (μmol L <sup>-1</sup> d <sup>-1</sup> )           |
| C1                                 | FDOM component C1 concentration (R.U.)                                 |
| C2                                 | FDOM component C2 concentration (R.U.)                                 |
| C3                                 | FDOM component C1 concentration (R.U.)                                 |
| C4                                 | FDOM component C2 concentration (R.U.)                                 |
| FDOM                               | Total FDOM components (C1+C2+C3+C4, R.U.)                              |
| %protein                           | Relative contribution of FDOM components C3 and C4 (%)                 |
| C1 c.r.                            | C1 consumption rate (R.U. d <sup>-1</sup> )                            |

|         |                                             |
|---------|---------------------------------------------|
| C2 c.r. | C2 consumption rate (R.U. d <sup>-1</sup> ) |
| C3 c.r. | C3 consumption rate (R.U. d <sup>-1</sup> ) |
| C4 c.r. | C4 consumption rate (R.U. d <sup>-1</sup> ) |
